# Supplementary material for: Porous CuO nanofibers derived from a Cu-based coordination polymer as a photocatalyst for the degradation of rhodamine B
Source: Royal Society of Chemistry journal article supplement (doi:10.1039/c8nj00608c), 2018-01-01
Supplement: c8nj00608c1.pdf [file c8nj00608c1.pdf]

## Supplementary Information

### Porous CuO nanofibers derived from a Cu-based coordination polymer as photocatalyst for the degradation of rhodamine B

Qing-Xia Zeng, Guan-Cheng Xu\*, Li Zhang, He Lin, Yan Lv, Dian-Zeng Jia\*

Key Laboratory of Energy Materials Chemistry, Ministry of Education; Key Laboratory of Advanced Functional Materials, Autonomous Region; Institute of Applied Chemistry, Xinjiang University, Urumqi, 830046 Xinjiang, P. R. China.

\* Corresponding author. E-mail: [xuguanchengxu@163.com](mailto:xuguanchengxu@163.com). Tel./Fax: +86-991-8580586

We submit manuscript to *New Journal of Chemistry* for publication.

Table S1

The photodegradation performances of CuO or CuO heterostructures for organic dyes in the reported literature.

| photocatalyst                       | photocatalyst mass | Initial dye concentration | Experimental conditions                                           | Dye degradation rate                       | Repeated photocatalytic degradation                | Ref      |
|-------------------------------------|--------------------|---------------------------|-------------------------------------------------------------------|--------------------------------------------|----------------------------------------------------|----------|
| CuO                                 | 100 mg             | 10 mg/L                   | A 300 W Xe lamp with an UV cutoff filter ( $\lambda \geq 420$ nm) | After 40 min of irradiation: 92% of RhB    | No cycle test                                      | 7(a)     |
| CuO                                 | 100 mg             | 1 mg/L                    | under visible light ( $\lambda \geq 420$ nm)                      | After 60 min of irradiation: 67% of RhB    | No cycle test                                      | 7(b)     |
| CuO                                 | 20 mg              | 10 mg/L                   | A 365 nm ultraviolet (UV) light (300 W)                           | After 105 min of irradiation: 86% of RhB   | 86% degradation efficiency after the fifth cycling | 7(c)     |
| CuO-g-C <sub>3</sub> N <sub>4</sub> | 40 mg              | 10 mg/L                   | under visible light ( $\lambda \geq 400$ nm)                      | After 20 min of irradiation: 94% of RhB    | 94% degradation efficiency after the third cycling | 7(d)     |
| CuO/GNS                             | 20 mg              | 5 mg/L                    | A 500 W Xe lamp with an UV cutoff filter ( $\lambda \geq 400$ nm) | After 15 min of irradiation: 97.22% of RhB | 90% degradation efficiency after the fifth cycling | 44       |
| CuO                                 | 5 mg               | 10 mg/L                   | under visible light ( $\lambda \geq 420$ nm)                      | After 160 min of irradiation: 96% of RhB   | 96% degradation efficiency after the fifth cycling | Our work |

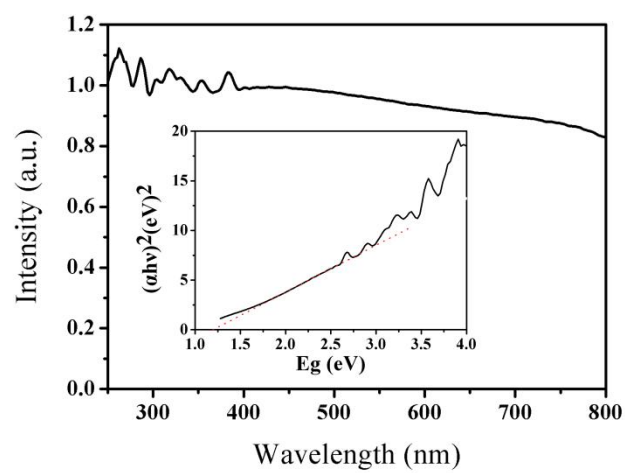

**Fig. S1.** UV-vis diffuse reflectance spectrum and the energy band gap (insert) of commercial CuO.

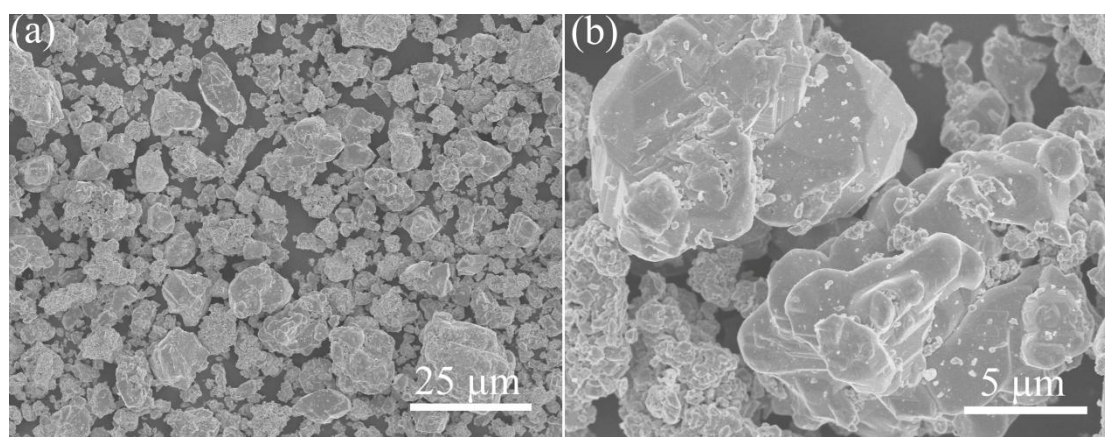

**Fig. S2.** SEM images of commercial CuO (a, b).

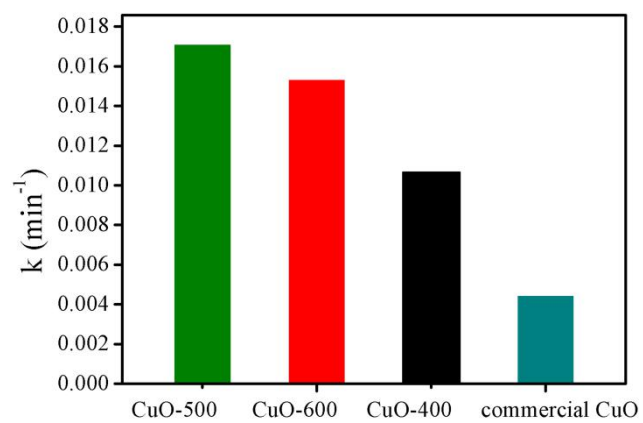

**Fig. S3.** Degradation rate constants of the CuO-T nanofibers and commercial CuO

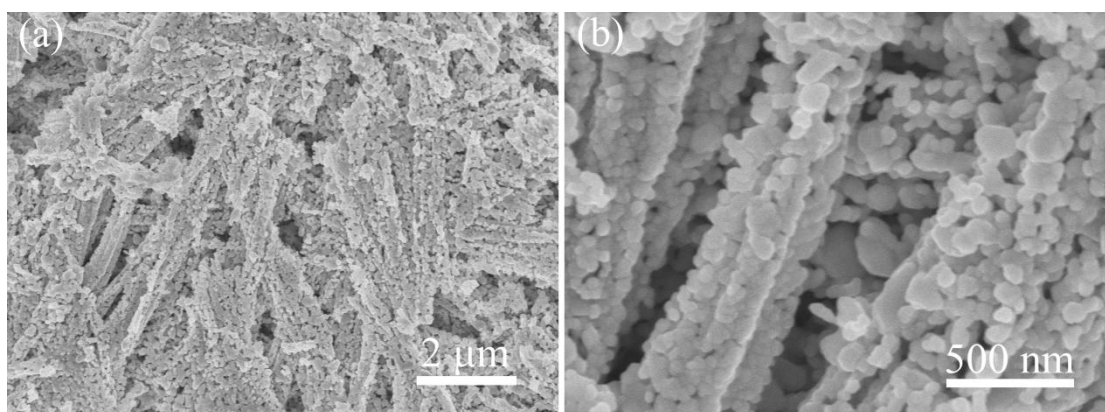

**Fig. S4.** SEM images of CuO-500 nanofibers after four cycles photocatalytic reaction (a, b).
